# Supplementary material for: Assessment of a workplace intervention targeting bullying and mental health for construction industry apprentices: A three-pillared approach
Source: Research Square preprint supplement (doi:10.21203/rs.3.rs-5672733/v1), 2025-04-09
Supplement: Supplementary file 1 [file 8c035b6652048d872f7beec3.docx]

Supplementary Table 1. Supervisor and Toolbox training participants’ occupations.

| **Participant Occupations** | **All** | | **QLD** | | **NT** | |
| --- | --- | --- | --- | --- | --- | --- |
| ***n*** | **%** | ***n*** | **%** | ***n*** | **%** |
| ***Supervisor Training*** |  |  |  |  |  |  |
| Administration | 4 | 4.5 | N/A |  | N/A |  |
| Advisor, Consultant, or Mentor | 5 | 5.6 |  |  |  |  |
| Director | 4 | 4.5 |  |  |  |  |
| Field Officer | 4 | 4.5 |  |  |  |  |
| Foreman | 8 | 9.0 |  |  |  |  |
| Leader or Leading Hand | 9 | 10.1 |  |  |  |  |
| Manager | 25 | 28.1 |  |  |  |  |
| Supervisor | 7 | 7.9 |  |  |  |  |
| Other | 21 | 23.6 |  |  |  |  |
| *Did not answer* | 2 | 2.2 |  |  |  |  |
| ***Toolbox Training*** |  |  |  |  |  |  |
| Apprentice | 76 | 10.2 | 71 | 9.9 | 5 | 18.5 |
| Airconditioning and Refrigeration Mechanics | 4 | 0.5 | 0 | 0 | 4 | 14.8 |
| Architectural, Building and Surveying Technicians | 1 | 0.1 | 1 | 0.1 | 0 | 0 |
| Bricklayers and Stonemasons | 6 | 0.8 | 6 | 0.8 | 0 | 0 |
| Building and Plumbing Labourers | 5 | 0.7 | 5 | 0.7 | 0 | 0 |
| Carpenters and Joiners | 68 | 9.2 | 68 | 9.5 | 0 | 0 |
| Civil Engineering Draftspersons and Technicians | 2 | 0.3 | 2 | 0.3 | 0 | 0 |
| Civil Engineering Professionals | 6 | 0.8 | 6 | 0.8 | 0 | 0 |
| Concreters | 15 | 2 | 15 | 2.1 | 0 | 0 |
| Construction Managers | 10 | 1.3 | 10 | 1.4 | 0 | 0 |
| Contract, Program and Project Administrators | 9 | 1.2 | 8 | 1.1 | 1 | 3.7 |
| Crane, Hoist and Lift Operators | 6 | 0.8 | 6 | 0.8 | 0 | 0 |
| Electrical Engineers | 1 | 0.1 | 1 | 0.1 | 0 | 0 |
| Electricians | 111 | 14.9 | 103 | 14.4 | 8 | 29.6 |
| Forklift Drivers | 4 | 0.5 | 4 | 0.6 | 0 | 0 |
| Glaziers | 7 | 0.9 | 7 | 1 | 0 | 0 |
| Human Resource Professionals | 4 | 0.5 | 3 | 0.4 | 1 | 3.7 |
| Importers, Exporters and Wholesalers | 1 | 0.1 | 1 | 0.1 | 0 | 0 |
| Insulation and Home Improvement Installers | 1 | 0.1 | 1 | 0.1 | 0 | 0 |
| Labourer | 54 | 7.3 | 52 | 7.3 | 2 | 7.4 |
| Management | 8 | 1.1 | 8 | 1.1 | 0 | 0 |
| Metal Casting, Forging and Finishing Trades Workers | 6 | 0.8 | 6 | 0.8 | 0 | 0 |
| Metal Fitters and Machinists | 2 | 0.3 | 2 | 0.3 | 0 | 0 |
| Occupational and Environmental Health Professionals | 15 | 2.0 | 14 | 2.0 | 1 | 3.7 |
| Office Managers | 1 | 0.1 | 1 | 0.1 | 0 | 0 |
| Operator | 9 | 1.2 | 9 | 1.3 | 0 | 0 |
| Other Building and Engineering Technicians | 1 | 0.1 | 1 | 0.1 | 0 | 0 |
| Other Construction and Mining Labourers | 10 | 1.3 | 10 | 1.4 | 0 | 0 |
| Other Engineering Professionals | 6 | 0.8 | 6 | 0.8 | 0 | 0 |
| Other Mobile Plant Operators | 5 | 0.7 | 5 | 0.7 | 0 | 0 |
| Other Specialist Managers | 21 | 2.8 | 21 | 2.9 | 0 | 0 |
| Other Stationary Plant Operators | 1 | 0.1 | 1 | 0.1 | 0 | 0 |
| Painting Trades Workers | 14 | 1.9 | 14 | 2 | 0 | 0 |
| Plasterers | 13 | 1.7 | 13 | 1.8 | 0 | 0 |
| Plumbers | 19 | 2.6 | 19 | 2.7 | 0 | 0 |
| Plumbing Trades | 3 | 0.4 | 3 | 0.4 | 0 | 0 |
| Production Managers | 3 | 0.4 | 3 | 0.4 | 0 | 0 |
| Receptionists | 1 | 0.1 | 1 | 0.1 | 0 | 0 |
| Roof Tilers | 3 | 0.4 | 3 | 0.4 | 0 | 0 |
| Safety Inspectors | 3 | 0.4 | 3 | 0.4 | 0 | 0 |
| Sheetmetal Trades Workers | 6 | 0.8 | 3 | 0.4 | 3 | 11.1 |
| Structural Steel and Welding Trades Workers | 11 | 1.5 | 10 | 1.4 | 1 | 3.7 |
| Structural Steel Construction Workers | 45 | 6.1 | 45 | 6.3 | 0 | 0 |
| Supply, Distribution and Procurement Managers | 4 | 0.5 | 4 | 0.6 | 0 | 0 |
| Surveyors and Spatial Scientists | 1 | 0.1 | 1 | 0.1 | 0 | 0 |
| Telecommunications Trades Workers | 3 | 0.4 | 3 | 0.4 | 0 | 0 |
| Wall and Floor Tilers | 9 | 1.2 | 9 | 1.3 | 0 | 0 |
| Other (Unspecified) | 1 | 0.1 | 1 | 0.1 | 0 | 0 |
| Unknown | 1 | 0.1 | 1 | 0.1 | 0 | 0 |
| *Did not answer* | 127 | 17.1 | 126 | 17.6 | 1 | 3.7 |

Supplementary Table 2. Participants’ feedback on Apprentice Resilience and Supervisor Training sessions.

| **Item** | ***n*** | **%** |
| --- | --- | --- |
| ***Apprentices Resilience Training*** |  |  |
| **The session was informative and enjoyable** |  |  |
| Strongly Disagree | 0 | 0 |
| Disagree | 0 | 0 |
| Neutral | 2 | 2.1 |
| Agree | 13 | 13.7 |
| Strongly Agree | 64 | 67.4 |
| *Did not answer* | 16 | 16.8 |
| **The content was relevant** |  |  |
| Strongly Disagree | 0 | 0 |
| Disagree | 0 | 0 |
| Neutral | 2 | 2.1 |
| Agree | 13 | 13.7 |
| Strongly Agree | 64 | 67.4 |
| *Did not answer* | 16 | 16.8 |
| **My facilitator was real and relatable** |  |  |
| Strongly Disagree | 0 | 0 |
| Disagree | 0 | 0 |
| Neutral | 2 | 2.1 |
| Agree | 14 | 14.7 |
| Strongly Agree | 63 | 66.3 |
| *Did not answer* | 16 | 16.8 |
| **I will follow up on the things I learned today** |  |  |
| Strongly Disagree | 0 | 0 |
| Disagree | 0 | 0 |
| Neutral | 10 | 10.5 |
| Agree | 15 | 15.8 |
| Strongly Agree | 53 | 55.8 |
| *Did not answer* | 17 | 17.9 |
| ***Supervisors Training*** |  |  |
| **The Supervisor training presentation was well presented and informative.** |  |  |
| Strongly Disagree | 1 | 1.1 |
| Disagree | 0 | 0.0 |
| Neither agree or disagree | 0 | 0.0 |
| Agree | 11 | 12.4 |
| Strongly Agree | 76 | 85.4 |
| *Did not answer* | 1 | 1.1 |
| **The supervisor training was relevant to my role and responsibilities.** |  |  |
| Strongly Disagree | 1 | 1.1 |
| Disagree | 0 | 0.0 |
| Neither agree or disagree | 1 | 1.1 |
| Agree | 20 | 22.5 |
| Strongly Agree | 66 | 74.2 |
| *Did not answer* | 1 | 1.1 |
